# Supplementary material for: Structural characterizations of the chloroplast translocon protein Tic110
Source: PubMed Central journal article supplement (PMC3823011; doi:10.1111/tpj.12249), 2013-05-25
Supplement: tpj0075-0847-SD2.pdf [file tpj0075-0847-SD2.pdf]

**Table S1. Data-collection and scattering-derived parameters of the SAXS analyses**

|                                                            | <b>CmTic110<sub>B</sub></b> | <b>CmTic110<sub>C</sub></b> |
|------------------------------------------------------------|-----------------------------|-----------------------------|
| <b>Data-collection parameters</b>                          |                             |                             |
| Instrument                                                 | NSRRC 23A                   | NSRRC 23A                   |
| Beam geometry                                              | 5 mm slit                   | 5 mm slit                   |
| Wavelength (Å)                                             | 0.885                       | 0.885                       |
| q range (Å <sup>-1</sup> )                                 | 0.0065-0.3342               | 0.0138-0.3999               |
| Exposure time (min)                                        | 5                           | 5                           |
| Concentration (mg ml <sup>-1</sup> )                       | 1                           | 1                           |
| Temperature (K)                                            | 277                         | 277                         |
| <b>Structural parameters</b>                               |                             |                             |
| I(0) (cm <sup>-1</sup> ) [from P(r)]                       | 0.431                       | 0.066                       |
| Rg (Å) [from P(r)]                                         | 71.63                       | 52.84                       |
| I(0) (cm <sup>-1</sup> ) (from Guinier)                    | 0.422                       | 0.064                       |
| Rg(Å) (from Guinier)                                       | 66.5                        | 49.2                        |
| Porod volume estimate (Å <sup>3</sup> )                    | 207,267                     | 95,916                      |
| Dry volume calculated from sequence (Å <sup>3</sup> )      | 134,559                     | 96,366                      |
| <b>Molecular-mass determination</b>                        |                             |                             |
| Partial specific volume (cm <sup>3</sup> g <sup>-1</sup> ) | 0.729                       | 0.729                       |
| Contrast (e Å <sup>-3</sup> )                              | 0.436                       | 0.435                       |
| Molecular mass Mr [from I(0)]                              | 172,000                     | 79,600                      |
| Calculated monomeric Mr from sequence                      | 59,903                      | 42,784                      |
| <b>Software employed</b>                                   |                             |                             |
| Primary data reduction                                     | NSRRC 23A homemade program  |                             |
| Data processing                                            | ATSAS                       | ATSAS                       |
| Ab <i>initio</i> analysis                                  | GASBOR                      | GASBOR                      |
| Validation and averaging                                   | DAMAVER                     | DAMAVER                     |
| Rigid-body modeling                                        | N/A                         | N/A                         |
| Computation of model intensities                           | -                           | CRY SOL                     |

**Table S2.** Sequences of primers used in this study

| Primers              | Sequences                                     |
|----------------------|-----------------------------------------------|
| CmTic110-F1          | gctctagaatgcagagtcctgcggaagc                  |
| CmTic110-R1          | tccccgggtcaggcggcttgattccaac                  |
| CmTic110A-F1         | ggaattccatatgtcgattggtgcaccgagcgcg            |
| CmTic110B-F1         | ggaattccatatggcaaatcgaagcgagtttacggacgc       |
| CmTic110C-F1         | ggaattccatatgcggggtcaggatgaagagcgcg           |
| CmTic110-R2          | caactcgagggcggcttgattccaacatctc               |
| CmTic110-D363amber-F | gaaaatttcgtctatattgactagtatattcgcgcacaagacgtc |
| CmTic110-D363amber-R | gacgtcttgctgcggaatatactagtcaatatagacgaaatttc  |
| CmTic110-F5-HindIII  | cgaagcttatgcagagtcctgcggaag                   |
| CmTic110-R5-XbaI     | cgtctagactagtcaatatagacgaaatttc               |
